# Supplementary material
Source: PubMed Central journal article supplement (PMC4476381)
Supplement: NIHMS668957-supplement-1.pdf [file NIHMS668957-supplement-1.pdf]

## SUPPLEMENTAL MATERIAL

**Table I:** Total number of patients in each collateral status by treatment type, percentage of patients with 90-day good clinical outcome (mRS 0-1), difference in rate of good outcome between treatment types with 95% confidence interval using the three collateral scores.

| Collateral Score Type |                    | Endovascular Treatment |           | IV tPA Only |           | Treatment Difference (%) | 95% CI |      |
|-----------------------|--------------------|------------------------|-----------|-------------|-----------|--------------------------|--------|------|
|                       |                    | N                      | % mRS 0-1 | N           | % mRS 0-1 |                          |        |      |
| Score 1               | Good (8-10)        | 46                     | 34.8      | 24          | 29.2      | 5.6                      | -17.2  | 28.4 |
|                       | Intermediate (6-7) | 42                     | 38.1      | 18          | 0         | 38.1                     | 23.4   | 52.8 |
|                       | Poor (0-5)         | 38                     | 13.2      | 17          | 17.6      | -4.5                     | -25.6  | 16.6 |
| Score 2               | Good (3-5)         | 47                     | 36.2      | 26          | 26.9      | 9.2                      | -12.6  | 31.1 |
|                       | Intermediate (2)   | 60                     | 31.7      | 26          | 7.7       | 24                       | 8.4    | 39.6 |
|                       | Poor (0-1)         | 19                     | 5.3       | 7           | 14.3      | -9                       | -36.8  | 18.8 |
| Score 3               | Good (3)           | 62                     | 35.5      | 26          | 26.9      | 8.6                      | -12.2  | 29.4 |
|                       | Intermediate (2)   | 30                     | 36.7      | 17          | 11.8      | 24.9                     | 1.8    | 48   |
|                       | Poor (0-1)         | 34                     | 11.8      | 16          | 6.3       | 5.5                      | -10.5  | 21.6 |

**Table II:** 90 day mRS stratified by the three collateral scores (trichotomized into good, intermediate and poor based on pre-defined cut-points of the ordinal scales).

| Collateral Score       |                        | 90 day mRS  | IV Only % | Endovascular % | van Elteren test p-value |       |
|------------------------|------------------------|-------------|-----------|----------------|--------------------------|-------|
| Score 1 (0-2/3-7/8-10) | Good (8-10)            | 0           | 8.3       | 15.6           | 0.201                    |       |
|                        |                        | 1           | 20.8      | 20             |                          |       |
|                        |                        | 2           | 12.5      | 22.2           |                          |       |
|                        |                        | 3           | 16.7      | 17.8           |                          |       |
|                        |                        | 4           | 20.8      | 11.1           |                          |       |
|                        |                        | 5-6         | 20.8      | 13.3           |                          |       |
|                        | Intermediate (3-7)     | 0           | 3.2       | 15.9           | 0.0085                   |       |
|                        |                        | 1           | 6.5       | 17.5           |                          |       |
|                        |                        | 2           | 16.1      | 7.9            |                          |       |
|                        |                        | 3           | 9.7       | 12.7           |                          |       |
|                        |                        | 4           | 12.9      | 22.2           |                          |       |
|                        |                        | 5-6         | 51.6      | 23.8           |                          |       |
|                        | Poor (0-2)             | 3           | 25        | 8.3            | 0.0905                   |       |
|                        |                        | 4           | 25        | 0              |                          |       |
|                        |                        | 5-6         | 50        | 91.7           |                          |       |
|                        | Score 1 (0-5/6-7/8-10) | Good (8-10) | 0         | 8.3            | 15.6                     | 0.201 |
|                        |                        |             | 1         | 20.8           | 20                       |       |
|                        |                        |             | 2         | 12.5           | 22.2                     |       |
| 3                      |                        |             | 16.7      | 17.8           |                          |       |
| 4                      |                        |             | 20.8      | 11.1           |                          |       |
| 5-6                    |                        |             | 20.8      | 13.3           |                          |       |
| Intermediate (6-7)     |                        | 0           | 0         | 14.6           | 0.0128                   |       |
|                        |                        | 1           | 0         | 24.4           |                          |       |

|                              |                           |     |      |      |        |
|------------------------------|---------------------------|-----|------|------|--------|
|                              |                           | 2   | 22.2 | 7.3  | 0.7446 |
|                              |                           | 3   | 11.1 | 12.2 |        |
|                              |                           | 4   | 22.2 | 19.5 |        |
|                              |                           | 5-6 | 44.4 | 22   |        |
|                              | <b>Poor (0-5)</b>         | 0   | 5.9  | 11.8 |        |
|                              |                           | 1   | 11.8 | 2.9  |        |
|                              |                           | 2   | 5.9  | 5.9  |        |
|                              |                           | 3   | 11.8 | 11.8 |        |
|                              |                           | 4   | 5.9  | 17.6 |        |
|                              |                           | 5-6 | 58.8 | 50   |        |
| <b>Score 2 (0-1/2-3/4-5)</b> | <b>Good (4-5)</b>         | 0   | 16.7 | 13.3 | 0.4743 |
|                              |                           | 1   | 16.7 | 20   |        |
|                              |                           | 2   | 16.7 | 13.3 |        |
|                              |                           | 3   | 50   | 20   |        |
|                              |                           | 4   | 0    | 26.7 |        |
|                              |                           | 5-6 | 0    | 6.7  |        |
|                              | <b>Intermediate (2-3)</b> | 0   | 4.3  | 15.7 | 0.0027 |
|                              |                           | 1   | 10.9 | 19.1 |        |
|                              |                           | 2   | 15.2 | 14.6 |        |
|                              |                           | 3   | 8.7  | 13.5 |        |
|                              |                           | 4   | 19.6 | 16.9 |        |
|                              |                           | 5-6 | 41.3 | 20.2 |        |
|                              | <b>Poor (0-1)</b>         | 0   | 0    | 6.3  | 0.2985 |
|                              |                           | 1   | 14.3 | 0    |        |
|                              |                           | 3   | 14.3 | 12.5 |        |
|                              |                           | 4   | 14.3 | 0    |        |

|                            |                         |      |      |      |        |
|----------------------------|-------------------------|------|------|------|--------|
|                            |                         | 5-6  | 57.1 | 81.3 |        |
| <b>Score 2 (0-1/2/3-5)</b> | <b>Good (3-5)</b>       | 0    | 7.7  | 17.4 | 0.1219 |
|                            |                         | 1    | 19.2 | 19.6 |        |
|                            |                         | 2    | 15.4 | 21.7 |        |
|                            |                         | 3    | 15.4 | 17.4 |        |
|                            |                         | 4    | 19.2 | 10.9 |        |
|                            |                         | 5-6  | 23.1 | 13   |        |
|                            | <b>Intermediate (2)</b> | 0    | 3.8  | 13.8 | 0.012  |
|                            |                         | 1    | 3.8  | 19   |        |
|                            |                         | 2    | 15.4 | 8.6  |        |
|                            |                         | 3    | 11.5 | 12.1 |        |
|                            |                         | 4    | 15.4 | 24.1 |        |
|                            |                         | 5-6  | 50   | 22.4 |        |
|                            | <b>Poor (0-1)</b>       | 0    | 0    | 6.3  | 0.2985 |
|                            |                         | 1    | 14.3 | 0    |        |
|                            |                         | 3    | 14.3 | 12.5 |        |
| 4                          |                         | 14.3 | 0    |      |        |
| 5-6                        |                         | 57.1 | 81.3 |      |        |
| <b>Score 3 (0-1/2/3)</b>   | <b>Good (3)</b>         | 0    | 7.7  | 13.1 | 0.3227 |
|                            |                         | 1    | 19.2 | 23   |        |
|                            |                         | 2    | 15.4 | 16.4 |        |
|                            |                         | 3    | 19.2 | 16.4 |        |
|                            |                         | 4    | 15.4 | 14.8 |        |
|                            |                         | 5-6  | 23.1 | 16.4 |        |
|                            | <b>Intermediate (2)</b> | 0    | 5.9  | 20.7 | 0.2288 |
|                            |                         | 1    | 5.9  | 17.2 |        |

|  |                   |     |      |      |        |
|--|-------------------|-----|------|------|--------|
|  |                   | 2   | 11.8 | 6.9  |        |
|  |                   | 3   | 11.8 | 6.9  |        |
|  |                   | 4   | 29.4 | 17.2 |        |
|  |                   | 5-6 | 35.3 | 31   |        |
|  | <b>Poor (0-1)</b> | 0   | 0    | 10   | 0.1545 |
|  |                   | 1   | 6.3  | 3.3  |        |
|  |                   | 2   | 12.5 | 10   |        |
|  |                   | 3   | 6.3  | 16.7 |        |
|  |                   | 4   | 6.3  | 16.7 |        |
|  |                   | 5-6 | 68.8 | 43.3 |        |

**Table III:** Effect of collateral status on clinical outcome (collateral status was categorized as good/intermediate vs. poor across all 3 scores). Results are reported as Risk Ratios with 95% Confidence Intervals for dichotomous outcomes (mRS 0-2 and 0-1 at 90 days) and as Odds ratios with 95% Confidence Intervals for the ordinal mRS at 90 days.

| <b>For mRS 0-2 as outcome</b> |                                        |                      |               |         |
|-------------------------------|----------------------------------------|----------------------|---------------|---------|
| <b>Collateral Score</b>       | <b>Collateral Status</b>               | <b>Unadjusted RR</b> | <b>95% CI</b> |         |
| Score 1                       | Intermediate/Good                      | 1.5341               | 0.955         | 2.4643  |
|                               | Poor                                   | 0.7829               | 0.264         | 2.3221  |
| Score 2                       | Intermediate/Good                      | 1.4579               | 0.9412        | 2.2584  |
|                               | Poor                                   | 0.3684               | 0.0265        | 5.126   |
| Score 3                       | Intermediate/Good                      | 1.4022               | 0.8864        | 2.2182  |
|                               | Poor                                   | 1.098                | 0.3258        | 3.7007  |
| <b>For mRS 0-1 as outcome</b> |                                        |                      |               |         |
| <b>Collateral Score</b>       | <b>Collateral Status</b>               | <b>Unadjusted RR</b> | <b>95% CI</b> |         |
| Score 1                       | Intermediate/Good                      | 2.1818               | 1.0509        | 4.53    |
|                               | Poor                                   | 0.7456               | 0.2008        | 2.7693  |
| Score 2                       | Intermediate/Good                      | 1.9439               | 1.0138        | 3.7273  |
|                               | Poor                                   | 0.3684               | 0.0265        | 5.126   |
| Score 3                       | Intermediate/Good                      | 1.7138               | 0.9019        | 3.2566  |
|                               | Poor                                   | 1.8824               | 0.2284        | 15.5138 |
| <b>For ordinal mRS</b>        |                                        |                      |               |         |
| <b>Collateral Score</b>       | <b>Collateral Status</b>               | <b>Unadjusted OR</b> | <b>95% CI</b> |         |
| Score 1                       | Intermediate/Good                      | 2.2526               | 1.162         | 4.3666  |
|                               | Poor                                   | 1.2019               | 0.4034        | 3.5812  |
| Score 2                       | Proportional odds assumption not valid |                      |               |         |
| Score 3                       | Intermediate/Good                      | 1.7585               | 0.9215        | 3.3556  |
|                               | Poor                                   | 2.6054               | 0.7815        | 8.6859  |
